# Supplementary material
Source: PubMed Central journal article supplement (PMC5710472)
Supplement: jamapsychiatry-74-987-s002.pdf [file jamapsychiatry-74-987-s002.pdf]

## Supplementary Online Content

de Zwaan M, Herpertz S, Zipfel S, et al. Effect of internet-based guided self-help vs individual face-to-face treatment on full or subsyndromal binge eating disorder in overweight or obese patients: the INTERBED randomized clinical trial. *JAMA Psychiatry*. Published online August 2, 2017. doi:10.1001/jamapsychiatry.2017.2150

### **eAppendix.** Supplementary Information

**eTable 1.** Sensitivity Analyses for the Primary Outcome (Changes in OBE Days Between T0 and T2)

**eTable 2.** Effect Sizes for Secondary Outcomes

**eTable 3.** Within-Group Changes of the Primary Outcome (OBE Days) Using the Intention-to-Treat Sample Without Imputations

**eTable 4.** Exploratory Longitudinal Analysis for the Number of OBE Days During the Previous 28 Days Also Containing the 1.5-Year Follow-up Data

**eTable 5.** Exploratory Longitudinal Analysis for the Number of OBE Days During the Previous 28 Days Including Only the 116 Patients for Whom 1.5-Year Follow-up Data Are Available (Completer)

**eTable 6.** Comparison of Dropout Rates Using Different Definitions (Whole Sample n = 178)

**eTable 7.** Indicators of Adherence to GSH-I and Correlations of Adherence Measures With Primary Outcome (Change in OBE Days)

**eFigure 1.** Course of OBE Days Also Containing the Follow-up Data at T4

**eFigure 2.** Abstinence Rates (Percentages of Patients With Zero OBE Days During the Last 28 Days) by Time and Treatment Condition

### **eReferences**

This supplementary material has been provided by the authors to give readers additional information about their work.

## **eAppendix. Supplementary Information**

### **Binge Eating Disorder in DSM-IV and DSM-5**

In this study the DSM-IV research criteria for BED<sup>1</sup> were used. The new formal DSM-5 criteria<sup>2</sup> are almost identical; however, a lower diagnostic threshold in terms of frequency and duration than formerly used was accepted. In the shift from provisional to formal diagnosis for BED, APA experts changed the criterion for frequency of BED from twice per week to once per week and the duration criterion from 6 months to 3 months, bringing the criteria in line with those for bulimia nervosa (BN).

### **Inclusion and Exclusion Criteria<sup>3</sup>**

#### **Inclusion**

- Diagnostic criteria for BED according to DSM-IV-TR or subsyndromal BED. Subsyndromal BED was defined as follows: patients had to meet the criteria for objective binge-eating episodes (OBEs), but could lack one of the other DSM-IV criteria (a frequency of less than 2 days with OBEs in 6 months, no marked distress, or the presence of only 2 instead of 3 of the 5 associated criteria).
- Age 18 years and older
- German speaking
- BMI between 27 and 40 kg/m<sup>2</sup>
- Private access to the Internet

It is of note that a sizable number of screened patients did not meet our inclusion criteria for BMI < 40 kg/m<sup>2</sup>, so that future studies may consider broadening the inclusion criteria to include patients with obesity grade 3.

#### **Exclusion**

- Serious unstable medical problems or conditions that influence weight or eating (e.g., type 1 diabetes mellitus, untreated thyroid problems)
- Pregnancy or lactation
- Ongoing psychotherapy
- Current bulimia nervosa
- Current substance abuse
- Psychotic disorder
- Current suicidal ideation
- Current intake of antipsychotic or weight-affecting drugs

### **Assessment Instruments**

#### **Primary outcome**

*Binge eating:* The German version of the EDE interview (EDE-I)<sup>4,5</sup> was administered at baseline, mid-treatment, end of treatment, 6-month, and 1.5-year follow-up by independent and trained assessors, blind to treatment condition. The EDE is a well-established semi-structured interview for eating disorder diagnosis and assessment. The primary outcome variable derived from the EDE-I was the number of days with OBEs over the last 28 days.

#### **Secondary outcomes**

*Secondary eating-related outcome variables:* The EDE was further used for determining the presence of a diagnosis of BED, abstinence from binge eating (0 OBEs over the last 28 days), and eating disorder psychopathology as measured with the EDE subscales restraint, and eating, shape, and weight concern, as well as the global EDE score, derived from the 4 subscales (Cronbach's  $\alpha = 0.87$  in this study's sample).

*Comorbid psychopathologic findings:* Secondary outcomes measured by the SCID-I/P<sup>1,6</sup> included the presence of an affective or anxiety disorder (i.e., social phobia, generalized anxiety disorder, specific phobia, posttraumatic stress disorder, and obsessive compulsive disorder) at each time point. Depression severity was measured with the Beck Depression Inventory (BDI-II), a 21-item self-report questionnaire<sup>7,8</sup>, with good internal consistency in this sample ( $\alpha = 0.91$ ). Self-esteem was measured with the Rosenberg Self-Esteem (RSES) Scale<sup>9,10</sup> ( $\alpha = 0.91$  in this sample).

*Quality of life:* Quality of life was measured by the Impact of Weight on Quality of Life-Lite (IWQOL-Lite)<sup>11,12</sup> and the Clinical Impairment Assessment (CIA)<sup>13</sup>. The IWQOL-Lite is a 26-item health-related quality of life questionnaire designed specifically for use with obese patients. Internal consistency was excellent ( $\alpha = 0.93$  in this sample). The CIA is a 16-item, self-report instrument for the measurement of impairment due to eating disorder psychopathology ( $\alpha = 0.90$  in this study's sample).

Validated German versions of all instruments are available, except for the CIA that was translated by AH and MdZ for this study, controlled by a back translation procedure by a licensed translator.

Details regarding design, methods, and treatment of the study have been published previously<sup>3</sup>. The study was conducted in accordance to ICH-GCP and CONSORT 2010<sup>14</sup> criteria. Extensions of the CONSORT 2010 statement for non-inferiority trials<sup>15</sup> and e-health trials<sup>16,17</sup> were taken into account.

### **Treatment Interventions**

Prior to the start of treatment and repeatedly over the course of the study, therapists received training for the GSH-I (provided by TL) as well as training for the CBT program (provided by AH). Regular supervision by a senior clinician was provided at each site. All therapists (n=29) were clinical psychologists (n=23) or residents in psychosomatic medicine (n=6) with at least 2 years of postgraduate training in psychotherapy. A detailed list of therapeutic interventions and techniques used has been published before<sup>3</sup>.

### **Internet-based guided self-help (GSH-I)**

For this study, the Self-Help Guide (Copyright © NetUnion & University Hospital of Geneva HUG) was used. This program is based on an online program for bulimia nervosa following CBT principles that was developed in the European Research Program SALUT by HUG and NetUnion and adapted to specifically address BED<sup>18</sup>. It consists of 11 modules. Participants worked through the modules sequentially. After predefined time intervals, the next module was made accessible to the participants by the coach.

Participants were instructed to contact their coach at least once weekly by e-mail, and they received feedback by e-mail once weekly on a fixed day from the coach (asynchronous communication). Coaches provided support and encouragement, and reinforced program participation through motivational messages. Structure and content of the e-mails were outlined in a coaches' manual (written by TL and FS), including sample e-mails, and giving instructions on how to handle unexpected emergencies (e.g., suicidality).

To ensure confidentiality and data protection, the online program used a password-protected server, which was located at NetUnion, Lausanne, Switzerland. Participants received a pseudonym and a password to access the online program. For security reasons, they had to change their password at first connection. An integrated messaging system enabled secured message exchange between coaches and participants. E-mail addresses were protected by one-way encryption. The program meets Health on the Net Foundation (HON) quality and ethics standards (<http://www.hon.ch/>).

Noninferiority of GSH-I with respect to face-to-face psychotherapy is of interest considering that Internet-based treatment has some advantages over face-to-face treatment: it can be offered with minimum delay and at low cost, it respects patients' privacy and avoids embarrassment about needing psychotherapy, allows patients to work on their own pace, and allows patients to renew or update treatment as often as they wish, and at no extra cost.

### **Cognitive-behavioral therapy (CBT)**

For the face-to-face therapy, the German evidence-based manual, "Binge Eating and Obesity: Cognitive-Behavioral Therapy Manual for Binge-Eating Disorder" published by Hilbert and Tuschen-Caffier<sup>19,20</sup> was used. The manual comprises the following phases: (1) initial treatment phase for motivational enhancement; (2) intensive treatment phase, including modules on eating behavior, body image, and stress; and (3) self-management phase for relapse prevention. Participants received therapy twice weekly for the first month and once weekly from month 2 to month 4. All CBT sessions were audiotaped if participants gave their consent. One of four consecutive audiotapes of each participant was randomly chosen and checked with regard to manual adherence using a checklist on content, the material worked on, and formal (e.g., session duration) characteristics. Therapist adherence was generally very good with 74% of all CBT sessions fulfilling the criteria for excellent therapist adherence<sup>21</sup>.

### **Severe Adverse Events**

Four patients reported transient suicidal ideation during the course of the study (3 GSH-I and 1 CBT). Of those, three (2 GSH-I, 1 CBT) received additional treatment sessions (crisis intervention; see Flow Diagram Figure 1) and were withdrawn from the study. Suicidality resolved in all cases. One patient experienced a heart attack after the first session with the coach (GSH-I) and required hospitalization, no death occurred. Serious adverse events were reported to the IRB and the Data Safety Monitoring Board for the study.

### **Randomization and Masking**

Individuals who met the inclusion criteria and gave written informed consent were randomized. Randomization was performed at a 1:1 ratio (without stratification) centrally by the independent Coordination Center for Clinical Trials (KKS) in Marburg, using a computer-generated randomization sequence. Treatment and assessment were separated: therapists and coaches were not involved in assessing treatment outcome and assessors were not involved in treatment. Assessors were blinded to treatment assignment. The statistician who conducted the statistical analyses (AM) was not involved in randomization. Treatment allocation was not disclosed to the statistician until all data checks were completed.

### **Sample Size Estimation**

The primary outcome is the difference (delta,  $\Delta$ ) in the number of OBE days over the past 28 days between baseline (T0) and end of treatment (T2). To test for non-inferiority, we specified a non-inferiority margin of one OBE day in favor of CBT. The non-inferiority of GSH-I compared to CBT would be shown, if the upper boundary of the corresponding 95% CI of the difference between  $\Delta$  in CBT and  $\Delta$  in GSH-I ( $\Delta$  CBT minus  $\Delta$  GSH-I) would be less than 1 OBE day. Given a lack of research supporting an evidence-based non-inferiority margin at the time of study design, this margin has been agreed upon in discussions with international clinical experts. Assuming a standard deviation of 2.1 days in both groups for the number of OBE days over the evaluation period and a drop-out rate up to 20% from T0 to T2, a total of 175 participants needed to be recruited to guarantee a statistical power of at least 80% when testing for noninferiority in the confirmatory analysis.

### **Allegiance effects**

Allegiance effects are very difficult to be addressed<sup>22</sup>. A sensitivity analysis including the therapists (n=29) as random effect instead of study center in the mixed model was conducted. Both adjustments did not change the results in anyone direction (eTable 1).

By having the same therapists offering both treatments we hoped to mitigate the influence of potential therapist confounders such as gender, age, differences in the ability to form therapeutic alliances, differences in therapist's competence, adherence to the treatment protocol, and attachment styles.

It is well known that the allegiance outcome association is weaker when the methodological quality of a study is high<sup>23</sup>. In a meta-analysis allegiance effects (inflation of the reported effect) were not statistically significant when the analyses were limited to studies where authors have assessed the integrity of the delivered treatments<sup>22</sup>. In our study both treatments were highly structured, the CBT was manualized as was the timing and content of the messages exchanged with the patients in the GSH-I condition. To ensure standardization of treatment all treatment staff was trained by the developer of the Internet-based program (TL) and the developer of the CBT program (AH). In addition, therapist adherence to both the CBT and the email content was rated by 2 experienced therapists who gave regular feed-back. Finally, assessors were blinded to treatment condition.

## **Adherence with GSH-I**

Markers of adherence were selected in accordance with other studies using this program in patients with BED<sup>18,25</sup>. NetUnion, the company that developed the Internet program provided us with an exported script of the data. The following indicators of adherence were used:

- the number of modules completed,
- the number of days completed in the diary.
- the number of messages exchanged,

We analyzed the correlations of these 3 markers of adherence with our main outcome (change in OBE days) in the per protocol sample and in the mITT sample. By using the per protocol and mITT samples we followed the procedure proposed by Manwaring et al.<sup>26</sup> who included only patients with posttest data in their analyses. Correlational analyses between the indicators of adherence and the main outcome did not reveal any significant associations (eTable 6).

**eTable 1.** Sensitivity Analyses for the Primary Outcome (Changes in OBE Days Between T0 and T2)

|                                                                  | <b>GSH-I</b>     | <b>CBT</b>       | <b>Statistics</b>                |                |
|------------------------------------------------------------------|------------------|------------------|----------------------------------|----------------|
|                                                                  | <b>Mean (SD)</b> | <b>Mean (SD)</b> | <b>Adj. rel. effect (95% CI)</b> | <b>p-value</b> |
| Per-protocol: Study center fixed effect                          | 10.4 (8.7)       | 11.7 (7.8)       | 1.55 (0.05 to 3.04)              | .04            |
| mITT: Study center fixed effect                                  | 10.2 (8.8)       | 11.5 (7.7)       | 1.70 (0.23 to 3.17)              | .02            |
| mITT: Baseline imputation (8 of 169)                             | 9.2 (8.8)        | 11.3 (7.8)       | 2.42 (0.76 to 4.05)              | .005           |
| mITT: Without imputation (n = 161)                               | 10.1 (8.8)       | 11.4 (7.8)       | 1.50 (0.04 to 2.96)              | .05            |
| Per-protocol: Therapist as random effect instead of study center | 10.4 (8.7)       | 11.7 (7.8)       | 1.45 (0.03 to 2.87)              | .05            |
| mITT; Therapist as random effect instead of study center         | 10.2 (8.8)       | 11.5 (7.7)       | 1.58 (0.16 to 3.01)              | .03            |

Adj. rel. effect = adjusted relative effect, adjusting for age, sex, objective binge eating days at baseline, body mass index, Beck Depression Inventory, and Eating Disorder Examination-Interview global score; CBT = cognitive-behavioral therapy; GSH-I = Internet-based guided self-help; mITT = modified intention-to-treat sample

**eTable 2.** Effect Sizes for Secondary Outcomes

|                                                      | End of treatment |                |            | 6-month follow-up |                |            |
|------------------------------------------------------|------------------|----------------|------------|-------------------|----------------|------------|
|                                                      | GSH-I<br>N=77    | CBT<br>N=85    | Cohen<br>d | GSH-I<br>N=70     | CBT<br>N=80    | Cohen<br>d |
| <b>Primary Outcome</b>                               |                  |                |            |                   |                |            |
| OBE days, mean (SD)                                  | 3.9 (5.5)        | 2.0<br>(4.1)   | 0.38       | 5.3<br>(6.9)      | 2.8 (5.2)      | 0.42       |
| <b>Secondary Outcomes</b>                            |                  |                |            |                   |                |            |
| Abstinence from binge eating, No./total patients (%) | 27/76<br>(36)    | 52/85<br>(61)  | 0.48       | 26/68<br>(38)     | 46/79<br>(58)  | 0.39       |
| BED full diagnosis, No./total patients (%)           | 35/72<br>(49)    | 24/83<br>(29)  | 0.49       | 20/66<br>(30)     | 20/78<br>(26)  | 0.11       |
| Eating Disorder Examination (EDE), mean (SD)         |                  |                |            |                   |                |            |
| Global                                               | 2.0 (1.2)        | 1.9<br>(1.2)   | 0.12       | 2.0<br>(1.2)      | 1.7 (1.1)      | 0.29       |
| Restraint                                            | 1.4 (1.4)        | 1.5<br>(1.4)   | 0.05       | 1.6<br>(1.4)      | 1.3 (1.3)      | 0.21       |
| Eating concern                                       | 1.1 (1.2)        | 0.9<br>(1.1)   | 0.11       | 1.1<br>(1.3)      | 0.9 (1.1)      | 0.17       |
| Shape concern                                        | 2.9 (1.6)        | 2.6<br>(1.6)   | 0.17       | 2.8<br>(1.5)      | 2.4 (1.5)      | 0.26       |
| Weight concern                                       | 2.6 (1.5)        | 2.3<br>(1.5)   | 0.18       | 2.5<br>(1.4)      | 2.1 (1.5)      | 0.31       |
| Body mass index, mean (SD), kg/m <sup>2</sup>        | 32.9<br>(3.9)    | 34.2<br>(4.5)  | 0.31       | 33.1<br>(4.2)     | 33.5<br>(4.6)  | 0.10       |
| Mental comorbidity                                   |                  |                |            |                   |                |            |
| Affective disorders, No./total patients (%)          | 21/69<br>(30)    | 16/85<br>(19)  | 0.32       | 15/61<br>(25)     | 18/76<br>(24)  | 0.02       |
| BDI-II, mean (SD)                                    | 11.7<br>(12.4)   | 9.0<br>(10.8)  | 0.23       | 10.0<br>(11.9)    | 9.0<br>(10.0)  | 0.10       |
| Anxiety disorders, No./total patients (%)            | 9/69<br>(13)     | 16/85<br>(19)  | 0.17       | 9/61<br>(15)      | 18/76<br>(24)  | 0.23       |
| RSES, mean (SD)                                      | 20.4<br>(8.3)    | 21.5<br>(6.9)  | 0.14       | 21.4<br>(7.9)     | 22.1<br>(7.1)  | 0.10       |
| Quality of life                                      |                  |                |            |                   |                |            |
| IWQOL-Lite, mean (SD)                                | 65.8<br>(25.6)   | 63.8<br>(22.6) | 0.05       | 61.8<br>(26.3)    | 59.5<br>(24.1) | 0.10       |
| CIA, mean (SD)                                       | 12.1<br>(10.9)   | 11.9<br>(11.1) | 0.01       | 11.9<br>(11.5)    | 10.5<br>(10.9) | 0.14       |

BDI-II = Beck Depression Inventory-II, CBT = cognitive-behavioral therapy, CIA = Clinical Impairment Assessment, GSH-I = Internet-based guided self-help, IWQOL-Lite = Impact of Weight on Quality of Life- Lite, OBE = objective binge eating, RSES = Rosenberg Self-esteem Scale



Cohan d: 0.2 = small effect, 0.5 = medium effect, 0.8 = large effect<sup>24</sup>

**eTable 3.** Within-Group Changes of the Primary Outcome (OBE Days) Using the Intention-to-Treat Sample Without Imputations

|                        | <b>GSH-I (n=83)</b>       | <b>CBT (n=86)</b>         |
|------------------------|---------------------------|---------------------------|
|                        | Adj. rel. effect (95% CI) | Adj. rel. effect (95% CI) |
| Mid-treatment (T1)     | 0.46 (0.38 to 0.57)       | 0.32 (0.22 to 0.46)       |
| End of treatment (T2)  | 0.29 (0.22 to 0.38)       | 0.10 (0.07 to 0.15)       |
| 6-month follow-up (T3) | 0.45 (0.33 to 0.59)       | 0.13 (0.09 to 0.19)       |

All within-group effects  $p < .001$

Adj. rel. effect = adjusted relative effect, adjusting for age, sex, objective binge eating days at baseline, BMI, Beck Depression Inventory, and Eating Disorder Examination-Interview global score; CBT = cognitive-behavioral therapy; GSH-I = Internet-based guided self-help; OBE = objective binge eating

**eTable 4.** Exploratory Longitudinal Analysis for the Number of OBE Days During the Previous 28 Days Also Containing the 1.5-Year Follow-up Data

|    | <b>GSH-I</b>     | <b>CBT</b>       | <b>Statistics</b>                |                            |
|----|------------------|------------------|----------------------------------|----------------------------|
|    | <b>Mean (SD)</b> | <b>Mean (SD)</b> | <b>adj. rel. effect (95% CI)</b> | <b>p-value<sup>a</sup></b> |
| T0 | 14.1 (7.8)       | 13.5 (7.5)       | 0.99 (0.82 to 1.19)              | .92                        |
| T1 | 6.6 (7.3)        | 5.0 (7.1)        | 0.79 (0.58 to 1.09)              | .15                        |
| T2 | 3.9 (5.5)        | 2.0 (4.1)        | 0.43 (0.28 to 0.67)              | <.001                      |
| T3 | 5.3 (6.9)        | 2.8 (5.2)        | 0.40 (0.25 to 0.63)              | <.001                      |
| T4 | 5.1 (8.2)        | 4.2 (6.3)        | 0.91 (0.54 to 1.50)              | .70                        |

T0=baseline, T1=mid-treatment, T2=end of treatment, T3=6-month follow-up, T4=1.5-year follow-up

Adj. rel. effect = adjusted relative effect, adjusting for age, sex, objective binge eating days at baseline, BMI, Beck Depression Inventory, and Eating Disorder Examination-Interview global score;

<sup>a</sup>based on random coefficients modeling (mixed effect models) with the negative binomial as outcome distribution

**eTable 5.** Exploratory Longitudinal Analysis for the Number of OBE Days During the Previous 28 Days Including Only the 116 Patients for Whom 1.5-Year Follow-up Data Are Available (Completer)

|    | <b>GSH-I</b>     | <b>CBT</b>       | <b>Statistics</b>                |                            |
|----|------------------|------------------|----------------------------------|----------------------------|
|    | <b>Mean (SD)</b> | <b>Mean (SD)</b> | <b>adj. rel. effect (95% CI)</b> | <b>p-value<sup>a</sup></b> |
| T0 | 14.9 (8.3)       | 14.0 (7.7)       | 1.00 (0.76 to 1.30)              | .97                        |
| T1 | 7.2 (7.5)        | 5.5 (7.5)        | 0.77 (0.53 to 1.11)              | .16                        |
| T2 | 4.1 (5.9)        | 2.2 (4.0)        | 0.48 (0.29 to 0.79)              | .004                       |
| T3 | 5.4 (7.1)        | 3.0 (5.4)        | 0.56 (0.34 to 0.90)              | .02                        |
| T4 | 5.1 (8.2)        | 4.2 (6.3)        | 0.92 (0.58 to 1.45)              | .71                        |

T0=baseline, T1=mid-treatment, T2=end of treatment, T3=6-month follow-up, T4=1.5-year follow-up

Adj. rel. effect = adjusted relative effect, adjusting for age, sex, objective binge eating days at baseline, BMI, Beck Depression Inventory, and Eating Disorder Examination-Interview global score;

<sup>a</sup>based on random coefficients modeling (mixed effect models) with the negative binomial as outcome distribution

**eTable 6.** Comparison of Dropout Rates Using Different Definitions (Whole Sample n = 178)

| Definitions of drop-out                     | GSH-I      | CBT       | Statistics           |                      |
|---------------------------------------------|------------|-----------|----------------------|----------------------|
|                                             | N (%)      | N (%)     | OR (95% CI)          | p-value <sup>c</sup> |
| Insufficient treatment dose <sup>a</sup>    | 9 (10.1%)  | 7 (7.9%)  | 1.27 (0.40 to 4.22)  | .79                  |
| No post-baseline measurement                | 6 (6.7%)   | 3 (3.4%)  | 1.99 (0.41 to 12.73) | .50                  |
| Excluded from per protocol set <sup>b</sup> | 17 (19.1%) | 8 (9%)    | 2.30 (0.87 to 6.56)  | .08                  |
| No end of treatment rating                  | 13 (14.6%) | 4 (9%)    | 3.49 (1.02 to 15.37) | .04                  |
| No 6-month follow-up rating                 | 21 (23.6%) | 9 (11.2%) | 2.64 (1.07 to 7.04)  | .03                  |

<sup>a</sup> < 12 of 20 CBT sessions; logged in until < week 10 in GSH-I

<sup>b</sup> no post-baseline measurement available, insufficient treatment dose, and/or crisis intervention; including study dropouts (5 in the GSH-I and 2 in the CBT group)

<sup>c</sup> p-values based on Fisher's exact test for independence.

**eTable 7.** Indicators of Adherence to GSH-I and Correlations of Adherence Measures With Primary Outcome (Change in OBE Days)

|                                       | Per protocol (n=72)            |              |         | mITT (n=83)                    |              |         |
|---------------------------------------|--------------------------------|--------------|---------|--------------------------------|--------------|---------|
|                                       | Mean (SD)<br>Range             | corr. coeff. | p-value | Mean (SD)<br>Range             | corr. coeff. | p-value |
| Number of modules completed           | 8.7 (2.8) <sup>a</sup><br>1-11 | 0.06         | .62     | 8.4 (3.2) <sup>b</sup><br>0-11 | 0.08         | .47     |
| Number of days completed in the diary | 108<br>(32.2)<br>3-163         | 0.10         | .41     | 104.4<br>(37.4)<br>0-163       | 0.13         | .26     |
| Number of messages exchanged          | 16.4 (2.3)<br>8-21             | -0.16        | .18     | 15.9 (3.4)<br>0-21             | -0.04        | .74     |

<sup>a</sup> mean percent in per protocol sample: 79.5%

<sup>b</sup> mean percent in mITT sample: 76%

**eFigure 1.** Course of OBE Days Also Containing the Follow-up Data at T4

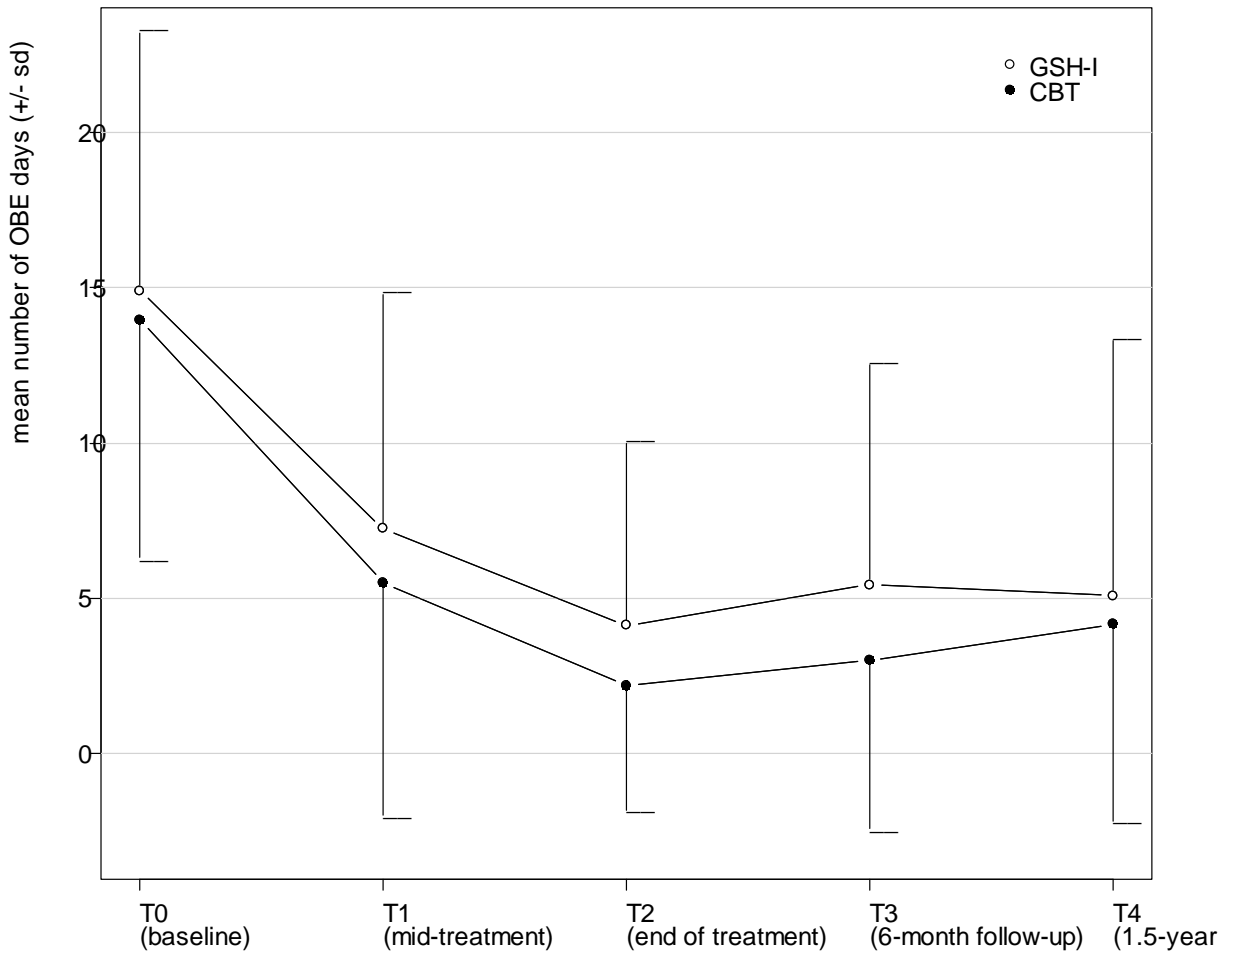

**eFigure 2.** Abstinence Rates (Percentages of Patients With Zero OBE Days During the Last 28 Days) by Time and Treatment Condition

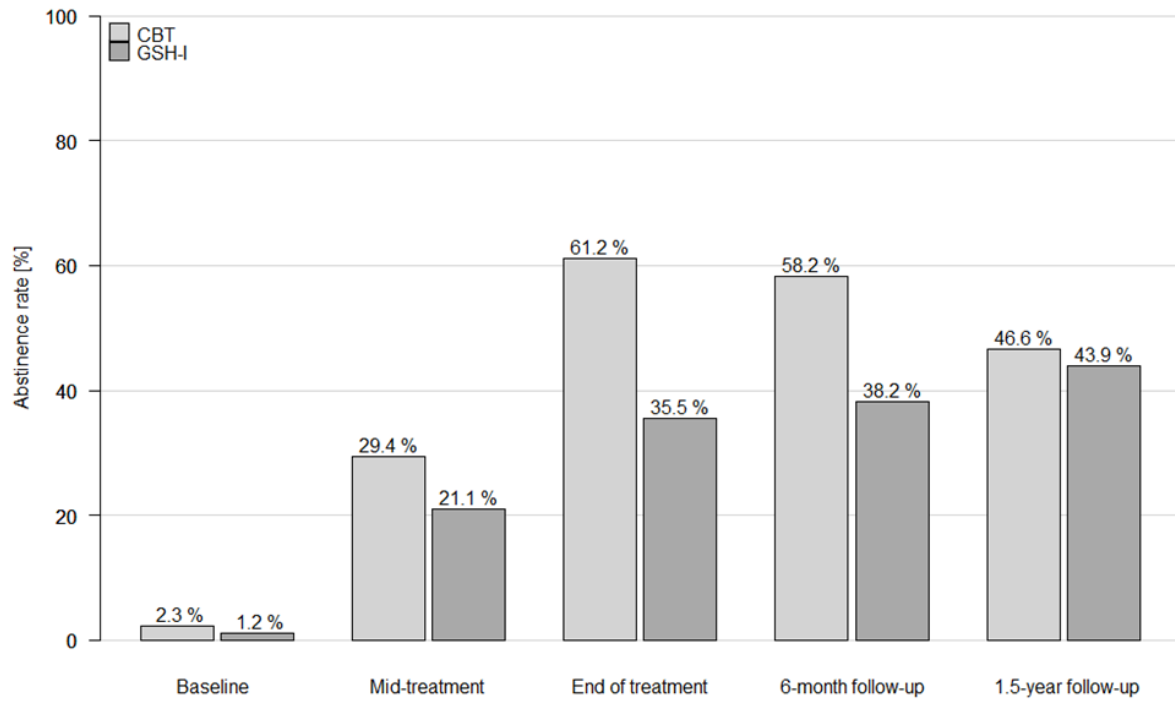

OBE = objective binge eating



## eReferences

1. American Psychiatric Association. *Diagnostic and Statistical Manual of Mental Disorders*. 4th ed., text rev.. Washington, DC: American Psychiatric Association; 2000.
2. American Psychiatric Association. *Diagnostic and Statistical Manual of Mental Disorders*. 5th ed. Arlington, VA: American Psychiatric Association; 2013.
3. de Zwaan M, Herpertz S, Zipfel S, et al. INTERBED: internet-based guided self-help for overweight and obese patients with full or subsyndromal binge eating disorder. A multicenter randomized controlled trial. *Trials*. 2012;13:220.
4. Fairburn CG, Cooper Z: The Eating Disorder Examination 12th edition. In *Binge eating: Nature, assessment, and treatment*. Edited by Fairburn CG and Wilson GT. New York: Guilford Press; 1993:317-360.
5. Hilbert A, Tuschen-Caffier B, Ohms M: Eating Disorder Examination: Deutschsprachige Version des strukturierten Essstörungeninterviews. *Diagnostica*. 2004;50:98-106.
6. Wittchen HU, Zaudig M, Fydrich T: *Strukturiertes Klinisches Interview für DSM-IV (SKID)*. Göttingen: Hogrefe; 1997.
7. Beck AT, Steer RA., Brown GK: *Beck Depression Inventory–II (BDI–II)*. San Antonio, TX: Harcourt Assessment Inc.; 1996.
8. Hautzinger M, Keller F, Kühner C: *Beck Depressions-Inventar (BDI-II) Revision*. Frankfurt/Main: Harcourt Test Services; 2006.
9. Rosenberg M: *Society and adolescent self-image*. Princeton, NJ: Princeton University Press; 1965.
10. Ferring D, Filipp SH. Messung des Selbstwertgefühls: Befunde zu Reliabilität, Validität und Stabilität der Rosenberg-Skala. *Diagnostica*. 1996;42:284-292.
11. Kolotkin RL, Crosby RD. Psychometric evaluation of the impact of weight on quality of life questionnaire (IWQOL-lite) in a community sample. *Qual Life Res*. 2002;11(2):157-171.
12. Mueller A, Holzapfel C, Hauner H, et al. Psychometric evaluation of the German version of the impact of weight on Quality of Life-Lite (IWQOL-Lite) questionnaire. *Exp Clin Endocrinol Diabetes*. 2011;119(2):69-74.
13. Bohn K, Doll HA, Cooper Z, O'Connor M, Palmer RL, Fairburn CG. The measurement of impairment due to eating disorder psychopathology. *Behav Res Ther*. 2008;46(10):1105-1110.
14. Moher D, Hopewell S, Schulz KF, et al. CONSORT 2010 explanation and elaboration: updated guidelines for reporting parallel group randomised trials. *Int J Surg*. 2012;10(1):28-55.
15. Piaggio G, Elbourne DR, Pocock SJ, Evans SJ, Altman DG; CONSORT Group. Reporting of noninferiority and equivalence randomized trials: extension of the CONSORT 2010 statement. *JAMA*. 2012;308(24):2594-2604.
16. Eysenbach G, CONSORT-EHEALTH Group. CONSORT-EHEALTH. Improving and standardizing evaluation reports of web-based and mobile health interventions. *J Med Internet Res*. 2011;13(4):e126

17. Eysenbach G. CONSORT-EHEALTH. implementation of a checklist for authors and editors to improve reporting of web-based and mobile randomized controlled trials. *Stud Health Technol Inform.* 2013;192:657-661.
18. Carrard I, Crépin C, Rouget P, Lam T, Golay A, Van der Linden M. Randomised controlled trial of a guided self-help treatment on the Internet for binge eating disorder. *Behav Res Ther.* 2011;49(8):482-491.
19. Hilbert A, Tuschen-Caffier B: Essanfälle und Adipositas: Ein Manual zur Kognitiv-Behavioralen Therapie der „Binge-Eating“-Störung. Göttingen: Hogrefe; 2011.
20. Hilbert A, Tuschen-Caffier B. Body image interventions in cognitive-behavioural therapy of binge-eating disorder: a component analysis. *Behav Res Ther.* 2004;42(11):1325-1339.
21. Brauhardt A, de Zwaan M, Herpertz S, et al. Therapist adherence in individual cognitive-behavioral therapy for binge-eating disorder: assessment, course, and predictors. *Behav Res Ther.* 2014;61:55-60.
22. Dragioti E, Dimoliatis I, Fountoulakis KN, Evangelou E. A systematic appraisal of allegiance effect in randomized controlled trials of psychotherapy. *Ann Gen Psychiatry.* 2015;14:25.
23. Munder T, Gerger H, Trelle S, Barth J. Testing the allegiance bias hypothesis: a meta-analysis. *Psychother Res.* 2011;21(6):670-684.
24. Cohen J. Quantitative methods in psychology. A power primer. *Psychol Bull.* 1992;112(1):155-159.
25. Carrard I, Crépin C, Rouget P, Lam T, Van der Linden M, Golay A. Acceptance and efficacy of a guided internet self-help treatment program for obese patients with binge eating disorder. *Clin Pract Epidemiol Ment Health.* 2011;7:8-18.
26. Manwaring JL, Bryson SW, Goldschmidt AB, et al. Do adherence variables predict outcome in an online program for the prevention of eating disorders? *J Consult Clin Psychol.* 2008;76(2):341-346.
